# Supplementary material for: Fe2Co2Nb2O9: a magnetoelectric honeycomb antiferromagnet
Source: Royal Society of Chemistry journal article supplement (doi:10.1039/d1tc02950a), 2021-01-01
Supplement: d1tc02950a1.pdf [file d1tc02950a1.pdf]

## Supplementary

Tables summarizing the main characteristics distances of FCNO versus temperature. Rietveld calculations were made using the SXRPD data; from 70K down to 50K the structure is refined in the trigonal space group and in the monoclinic one for 25 and 12K.

**Table S.I:** Dependence versus temperature (K) of the average  $M_A$ -O distance (Å), volume of the  $M_AO_6$  octahedra (Å<sup>3</sup>) and  $M_A$ -O distances (Å)

| T  | < $M_A$ -O> | V- $M_AO_6$ | $M_A$ -O2 |
|----|-------------|-------------|-----------|-----------|-----------|-----------|-----------|-----------|
| 70 | 2.1291      | 12.7012     | 2.06(1)   | 2.06(1)   | 2.06(1)   | 2.194(8)  | 2.194(8)  | 2.194(8)  |
| 65 | 2.1227      | 12.6016     | 2.05(1)   | 2.05(1)   | 2.05(1)   | 2.199(8)  | 2.199(8)  | 2.199(8)  |
| 60 | 2.1257      | 12.6518     | 2.05(1)   | 2.05(1)   | 2.05(1)   | 2.199(8)  | 2.199(8)  | 2.199(8)  |
| 55 | 2.1242      | 12.6245     | 2.06(1)   | 2.06(1)   | 2.06(1)   | 2.193(7)  | 2.193(7)  | 2.193(7)  |
| 50 | 2.1257      | 12.6412     | 2.06(1)   | 2.06(1)   | 2.06(1)   | 2.193(8)  | 2.193(8)  | 2.193(8)  |
| 25 | 2.1246      | 12.5869     | 2.19(3)   | 2.11(3)   | 2.23(3)   | 2.11(3)   | 2.08(3)   | 2.03(3)   |
| 12 | 2.1216      | 12.5292     | 2.18(3)   | 2.12(3)   | 2.22(3)   | 2.09(3)   | 2.08(3)   | 2.05(3)   |

**Table S.II:** Dependence versus temperature (K) of the average  $M_B$ -O distance (Å), volume of

| T  | < $M_B$ -O> | V- $M_BO_6$ | $M_B$ -O1 | $M_B$ -O1 | $M_B$ -O1 | $M_B$ -O2 | $M_B$ -O2 | $M_B$ -O2 |
|----|-------------|-------------|-----------|-----------|-----------|-----------|-----------|-----------|
| 70 | 2.1522      | 12.6343     | 2.045(6)  | 2.045(6)  | 2.045(6)  | 2.259(7)  | 2.259(7)  | 2.259(7)  |
| 65 | 2.1609      | 12.7853     | 2.047(6)  | 2.047(6)  | 2.047(6)  | 2.275(7)  | 2.275(7)  | 2.275(7)  |
| 60 | 2.1603      | 12.7689     | 2.049(6)  | 2.049(6)  | 2.049(6)  | 2.271(7)  | 2.271(7)  | 2.271(7)  |
| 55 | 2.157       | 12.7225     | 2.044(6)  | 2.044(6)  | 2.044(6)  | 2.270(7)  | 2.270(7)  | 2.270(7)  |
| 50 | 2.1549      | 12.6814     | 2.041(6)  | 2.041(6)  | 2.041(6)  | 2.268(7)  | 2.268(7)  | 2.268(7)  |
| 25 | 2.1585      | 12.6852     | 2.02(3)   | 2.00(3)   | 2.11(3)   | 2.36(3)   | 2.22(3)   | 2.25(3)   |
| 12 | 2.1534      | 12.6093     | 2.04(3)   | 1.96(2)   | 2.11(3)   | 2.34(3)   | 2.20(3)   | 2.27(3)   |

the  $M_BO_6$  octahedra (Å<sup>3</sup>) and  $M_B$ -O distances (Å)

**Table S.III:** Dependence versus temperature (K) of the average Nb-O distance (Å), volume of the  $NbO_6$  octahedra (Å<sup>3</sup>) and Nb-O distances (Å)

| T  | <Nb-O> | V- $NbO_6$ | Nb-O1    | Nb-O1    | Nb-O1    | Nb-O2    | Nb-O2    | Nb-O2    |
|----|--------|------------|----------|----------|----------|----------|----------|----------|
| 70 | 2.0061 | 10.2031    | 2.113(7) | 2.113(7) | 2.113(7) | 1.899(6) | 1.899(6) | 1.899(6) |
| 65 | 2.0069 | 10.2221    | 2.107(7) | 2.107(7) | 2.107(7) | 1.907(6) | 1.907(6) | 1.907(6) |
| 60 | 2.0038 | 10.1648    | 2.105(7) | 2.105(7) | 2.105(7) | 1.903(6) | 1.903(6) | 1.903(6) |
| 55 | 2.0076 | 10.2417    | 2.113(7) | 2.113(7) | 2.113(7) | 1.903(6) | 1.903(6) | 1.903(6) |
| 50 | 2.0077 | 10.2533    | 2.114(7) | 2.114(7) | 2.114(7) | 1.901(6) | 1.901(6) | 1.901(6) |
| 25 | 2.0075 | 10.2376    | 2.07(4)  | 2.14(3)  | 2.14(4)  | 1.95(3)  | 1.83(3)  | 1.92(2)  |
| 12 | 2.0138 | 10.365     | 2.07(4)  | 2.12(4)  | 2.19(3)  | 1.92(3)  | 1.87(3)  | 1.92(2)  |

**Table S.IV:** Dependence versus temperature (K) of selected cation-cation distances (Å)

| T  | M <sub>A</sub> -M <sub>A</sub> | M <sub>A</sub> -M <sub>A</sub> | M <sub>A</sub> -M <sub>A</sub> | M <sub>B</sub> -M <sub>B</sub> | M <sub>B</sub> -M <sub>B</sub> | M <sub>B</sub> -M <sub>B</sub> | M <sub>A</sub> -M <sub>B</sub> |
|----|--------------------------------|--------------------------------|--------------------------------|--------------------------------|--------------------------------|--------------------------------|--------------------------------|
| 70 | 3.0235(8)                      | 3.0235(8)                      | 3.0235(8)                      | 3.405(2)                       | 3.405(2)                       | 3.405(2)                       | 2.926(5)                       |
| 65 | 3.0235(8)                      | 3.0235(8)                      | 3.0235(8)                      | 3.401(2)                       | 3.401(2)                       | 3.401(2)                       | 2.929(5)                       |
| 60 | 3.0235(8)                      | 3.0235(8)                      | 3.0235(8)                      | 3.401(2)                       | 3.401(2)                       | 3.401(2)                       | 2.929(5)                       |
| 55 | 3.0228(8)                      | 3.0228(8)                      | 3.0228(8)                      | 3.404(2)                       | 3.404(2)                       | 3.404(2)                       | 2.923(5)                       |
| 50 | 3.0238(8)                      | 3.0238(8)                      | 3.0238(8)                      | 3.403(2)                       | 3.403(2)                       | 3.403(2)                       | 2.928(5)                       |
| 25 | 2.98(2)                        | 3.10(1)                        | 2.99(1)                        | 3.30(2)                        | 3.45(1)                        |                                | 2.928(4)                       |
| 12 | 3.00(2)                        | 3.08(1)                        | 3.00(1)                        | 3.30(1)                        | 3.45(1)                        |                                | 2.930(4)                       |
|    |                                |                                |                                |                                |                                |                                |                                |
| T  | Nb-Nb                          | Nb-M <sub>B</sub>              | Nb-M <sub>B</sub>              | Nb-M <sub>B</sub>              | Nb-M <sub>A</sub>              | Nb-M <sub>A</sub>              | Nb-M <sub>A</sub>              |
| 70 | 3.053(3)                       | 3.0838(8)                      | 3.0838(8)                      | 3.0838(8)                      | 3.507(2)                       | 3.507(2)                       | 3.507(2)                       |
| 65 | 3.046(3)                       | 3.0839(8)                      | 3.0839(8)                      | 3.0839(8)                      | 3.508(2)                       | 3.508(2)                       | 3.508(2)                       |
| 60 | 3.048(3)                       | 3.0842(8)                      | 3.0842(8)                      | 3.0842(8)                      | 3.508(2)                       | 3.508(2)                       | 3.508(2)                       |
| 55 | 3.048(3)                       | 3.0836(8)                      | 3.0836(8)                      | 3.0836(8)                      | 3.509(2)                       | 3.509(2)                       | 3.509(2)                       |
| 50 | 3.044(3)                       | 3.0833(8)                      | 3.0833(8)                      | 3.0833(8)                      | 3.508(2)                       | 3.508(2)                       | 3.508(2)                       |
| 25 | 3.048(3)                       | 3.08(1)                        | 3.04(1)                        | 3.14(1)                        | 3.546(9)                       | 3.454(9)                       | 3.53(1)                        |
| 12 | 3.047(2)                       | 3.08(1)                        | 3.05(1)                        | 3.13(1)                        | 3.54(1)                        | 3.46(1)                        | 3.53(1)                        |
